# Supplementary material for: Derivation and validation of clinical prediction rules for diagnosis of infectious mononucleosis: a prospective cohort study
Source: HighWire-hosted journal article supplement (doi:10.1136/bmjopen-2022-068877), 2023-02-01
Supplement: bmjopen-2022-068877supp001_data_supplement.pdf [file bmjopen-2022-068877supp001_data_supplement.pdf]

**Supplementary Table 1: Likelihood ratios and post-test probabilities for EBV (Model 1 and Model 3)**

| Model 1 |      |                                       | Model 3 |      |                                       |
|---------|------|---------------------------------------|---------|------|---------------------------------------|
| Score   | LR+  | Post-test probability % *<br>(95% CI) | Score   | LR+  | Post-test probability % *<br>(95% CI) |
| >= 0    | 1.00 | 8.0 (4.6 to 11.4)                     | >= 0    | 1.00 | 8.0 (4.7 to 11.3)                     |
| >= 4    | 1.00 | 8.0 (4.6 to 11.5)                     | >= 3    | 1.00 | 8.0 (4.7 to 11.4)                     |
| >= 6    | 1.05 | 8.4 (4.8 to 12)                       | >= 5    | 1.01 | 8.1 (4.7 to 11.4)                     |
| >= 7    | 1.10 | 8.7 (5 to 12.4)                       | >= 6    | 1.08 | 8.5 (5.1 to 12.0)                     |
| >= 9    | 1.16 | 9.1 (5.2 to 13)                       | >= 7    | 1.13 | 8.9 (5.4 to 12.5)                     |
| >= 11   | 1.18 | 9.3 (5.3 to 13.3)                     | >= 8    | 1.17 | 9.3 (5.6 to 12.9)                     |
| >= 12   | 1.19 | 9.4 (5.4 to 13.4)                     | >= 12   | 1.20 | 9.4 (5.7 to 13.2)                     |
| >= 14   | 1.21 | 9.5 (5.4 to 13.6)                     | >= 13   | 1.21 | 9.5 (5.8 to 13.3)                     |
| >= 15   | 1.18 | 9.3 (5.2 to 13.3)                     | >= 14   | 1.22 | 9.6 (5.9 to 13.4)                     |
| >= 16   | 1.19 | 9.4 (5.3 to 13.5)                     | >= 15   | 1.24 | 9.8 (6.0 to 13.6)                     |
| >= 17   | 1.21 | 9.5 (5.3 to 13.7)                     | >= 16   | 1.22 | 9.6 (5.8 to 13.3)                     |
| >= 18   | 1.22 | 9.6 (5.4 to 13.8)                     | >= 17   | 1.24 | 9.7 (5.9 to 13.5)                     |
| >= 20   | 1.51 | 11.6 (6.3 to 16.9)                    | >= 18   | 1.48 | 11.4 (7.3 to 15.5)                    |
| >= 21   | 1.65 | 12.6 (6.9 to 18.3)                    | >= 19   | 1.78 | 13.4 (8.9 to 17.9)                    |
| >= 22   | 2.09 | 15.4 (8.3 to 22.4)                    | >= 20   | 1.89 | 14.1 (9.5 to 18.8)                    |
| >= 23   | 2.11 | 15.5 (8.4 to 22.6)                    | >= 21   | 2.07 | 15.2 (10.3 to 20.1)                   |
| >= 24   | 2.40 | 17.3 (9.3 to 25.3)                    | >= 22   | 2.15 | 15.7 (10.7 to 20.7)                   |
| >= 25   | 2.47 | 17.7 (9.5 to 25.9)                    | >= 23   | 2.09 | 15.4 (10.3 to 20.4)                   |
| >= 26   | 2.41 | 17.3 (9.1 to 25.6)                    | >= 24   | 2.17 | 15.9 (10.6 to 21.2)                   |
| >= 27   | 2.44 | 17.5 (9.2 to 25.9)                    | >= 25   | 2.20 | 16.1 (10.5 to 21.6)                   |
| >= 28   | 2.74 | 19.2 (10.2 to 28.3)                   | >= 26   | 2.54 | 18.1 (12.3 to 23.9)                   |
| >= 29   | 3.48 | 23.2 (12.2 to 34.2)                   | >= 27   | 2.70 | 19.0 (13.0 to 25.0)                   |

| Model 1         |       |                     | Model 3         |       |                     |
|-----------------|-------|---------------------|-----------------|-------|---------------------|
| <b>&gt;= 31</b> | 4.04  | 26.0 (14.0 to 38.1) | <b>&gt;= 28</b> | 3.30  | 22.3 (15.9 to 28.7) |
| <b>&gt;= 32</b> | 4.27  | 27.1 (14.6 to 39.5) | <b>&gt;= 29</b> | 3.57  | 23.7 (17.1 to 30.3) |
| <b>&gt;= 33</b> | 4.84  | 29.6 (15.8 to 43.4) | <b>&gt;= 31</b> | 4.40  | 27.7 (20.5 to 34.9) |
| <b>&gt;= 34</b> | 5.19  | 31.1 (16.8 to 45.4) | <b>&gt;= 33</b> | 4.57  | 28.4 (20.9 to 36.0) |
| <b>&gt;= 35</b> | 5.39  | 31.9 (17.4 to 46.5) | <b>&gt;= 34</b> | 5.73  | 33.2 (24.3 to 42.1) |
| <b>&gt;= 37</b> | 6.10  | 34.6 (19.2 to 50.1) | <b>&gt;= 35</b> | 6.61  | 36.5 (23.7 to 49.2) |
| <b>&gt;= 38</b> | 5.34  | 31.7 (15.5 to 47.9) | <b>&gt;= 36</b> | 6.29  | 35.4 (22.3 to 48.4) |
| <b>&gt;= 40</b> | 5.71  | 33.2 (15.7 to 50.7) | <b>&gt;= 38</b> | 6.78  | 37.1 (23.3 to 50.9) |
| <b>&gt;= 41</b> | 5.50  | 32.3 (14.3 to 50.4) | <b>&gt;= 39</b> | 7.34  | 39.0 (24.6 to 53.3) |
| <b>&gt;= 42</b> | 6.68  | 36.7 (17.1 to 56.4) | <b>&gt;= 40</b> | 8.01  | 41.0 (26.2 to 55.9) |
| <b>&gt;= 44</b> | 6.01  | 34.3 (14.5 to 54.1) | <b>&gt;= 41</b> | 7.21  | 38.5 (23.3 to 53.7) |
| <b>&gt;= 45</b> | 5.34  | 31.7 (11.9 to 51.6) | <b>&gt;= 43</b> | 7.05  | 38.0 (21.8 to 54.2) |
| <b>&gt;= 46</b> | 5.95  | 34.1 (11.7 to 56.4) | <b>&gt;= 44</b> | 10.57 | 47.9 (28.7 to 67.1) |
| <b>&gt;= 49</b> | 11.22 | 49.4 (19.2 to 79.5) | <b>&gt;= 45</b> | 8.81  | 43.4 (18.6 to 68.2) |
| <b>&gt;= 51</b> | 15.58 | 57.5 (22.6 to 92.5) | <b>&gt;= 53</b> | 8.81  | 43.4 (0.01 to 99.9) |
| <b>&gt;= 53</b> | 18.70 | 61.9 (22.3 to 99.9) |                 |       |                     |
| <b>&gt;= 56</b> | 14.02 | 54.9 (10.4 to 99.4) |                 |       |                     |
| <b>&gt;= 57</b> | 18.70 | 61.9 (5.8 to 99.9)  |                 |       |                     |

\* Based on pre-test probability of 8%

**Supplementary Table 2: Likelihood ratios and post-test probabilities for EBV (Model 2 and Model 4)**

| Model 2 |       |                                       | Model 4 |      |                                       |
|---------|-------|---------------------------------------|---------|------|---------------------------------------|
| Score   | LR+   | Post-test probability % *<br>(95% CI) | Score   | LR+  | Post-test probability % *<br>(95% CI) |
| ≥0      | 1     | 8.0 (4.8 to 11.2)                     | ≥0      | 1    | 8.0 (4.8- to 11.2)                    |
| ≥2      | 3.27  | 22.1 (12.1 to 32.2)                   | ≥1      | 2.14 | 15.7 (9.2 to 22.2)                    |
| ≥5      | 3.49  | 23.3 (11.6 to 35.0)                   | ≥2      | 2.70 | 19.0 (10.0 to 28.0)                   |
| ≥7      | 12.56 | 52.2 ( 24.5 to 79.9)                  | ≥3      | 3.48 | 23.2 (8.5 to 37.9)                    |

\*Based on pre-test probability of 8%

**Supplementary Table 3: Likelihood ratios and post-test probabilities for positive EBV in validation cohort**

| Score | Positive<br>Likelihood<br>Ratio (LR+) | Post-test Prob<br>(95% CI) 8% prior | Post-test Prob (95%<br>CI) 12% prior | Post-test Prob (95%<br>CI) 16% prior |
|-------|---------------------------------------|-------------------------------------|--------------------------------------|--------------------------------------|
| ≥0    | 1                                     | 8.0 (4.8 to 11.2)                   | 12.0 (10.7 to 13.3)                  | 16.0 (14.5 to 17.5)                  |
| ≥1    | 2.14                                  | 15.7 (9.2 to 22.2)                  | 22.6 (15.1 to 30.1)                  | 28.9 (20.8 to 37.1)                  |
| ≥2    | 2.70                                  | 19.0 (10.0 to 28.0)                 | 26.9 (16.8 to 37.1)                  | 34.0 (23.1 to 44.9)                  |
| ≥3    | 3.48                                  | 23.2 (8.5 to 37.9)                  | 32.2 (15.9 to 48.4)                  | 39.8 (22.8 to 56.9)                  |

**Supplementary Table 4: Post-test probabilities incorporating atypical lymphocytosis as a diagnostic test in series (Model 1 and Model 3)**

| Model 1         | Pre-test            | Post-test probability | Model 3         | Pre-test probability | Post-test probability % |
|-----------------|---------------------|-----------------------|-----------------|----------------------|-------------------------|
| Score           | probability %       | %                     | Score           | %                    | (95% CI)                |
|                 | (95% CI)            | (95% CI)              |                 | (95% CI)             |                         |
| <b>&gt;= 0</b>  | 8.0 (4.6 to 11.4)   | 83.9 (79.3 to 88.6)   | <b>&gt;= 0</b>  | 8.0 (4.7 to 11.3)    | 83.9 (79.4 to 88.4)     |
| <b>&gt;= 4</b>  | 8.0 (4.6 to 11.5)   | 84.0 (79.3 to 88.7)   | <b>&gt;= 3</b>  | 8.0 (4.7 to 11.4)    | 84.0 (79.5 to 88.5)     |
| <b>&gt;= 6</b>  | 8.4 (4.8 to 12)     | 84.6 (79.9 to 89.3)   | <b>&gt;= 5</b>  | 8.1 (4.7 to 11.4)    | 84.0 (79.6 to 88.5)     |
| <b>&gt;= 7</b>  | 8.7 (5 to 12.4)     | 85.1 (80.4 to 89.8)   | <b>&gt;= 6</b>  | 8.5 (5.1 to 12.0)    | 84.9 (80.4 to 89.3)     |
| <b>&gt;= 9</b>  | 9.1 (5.2 to 13)     | 85.8 (81.0 to 90.5)   | <b>&gt;= 7</b>  | 8.9 (5.4 to 12.5)    | 85.5 (81.1 to 89.9)     |
| <b>&gt;= 11</b> | 9.3 (5.3 to 13.3)   | 86.0 (81.3 to 90.8)   | <b>&gt;= 8</b>  | 9.3 (5.6 to 12.9)    | 86.0 (81.6 to 90.4)     |
| <b>&gt;= 12</b> | 9.4 (5.4 to 13.4)   | 86.2 (81.4 to 90.9)   | <b>&gt;= 12</b> | 9.4 (5.7 to 13.2)    | 86.2 (81.8 to 90.6)     |
| <b>&gt;= 14</b> | 9.5 (5.4 to 13.6)   | 86.3 (81.5 to 91.1)   | <b>&gt;= 13</b> | 9.5 (5.8 to 13.3)    | 86.3 (82.0 to 90.7)     |
| <b>&gt;= 15</b> | 9.3 (5.2 to 13.3)   | 86.0 (81.1 to 90.9)   | <b>&gt;= 14</b> | 9.6 (5.9 to 13.4)    | 86.5 (82.1 to 90.8)     |
| <b>&gt;= 16</b> | 9.4 (5.3 to 13.5)   | 86.1 (81.2 to 91.0)   | <b>&gt;= 15</b> | 9.8 (6.0 to 13.6)    | 86.7 (82.3 to 91.0)     |
| <b>&gt;= 17</b> | 9.5 (5.3 to 13.7)   | 86.3 (81.4 to 91.2)   | <b>&gt;= 16</b> | 9.6 (5.8 to 13.3)    | 86.4 (82.0 to 90.8)     |
| <b>&gt;= 18</b> | 9.6 (5.4 to 13.8)   | 86.4 (81.5 to 91.3)   | <b>&gt;= 17</b> | 9.7 (5.9 to 13.5)    | 86.6 (82.2 to 91.0)     |
| <b>&gt;= 20</b> | 11.6 (6.3 to 16.9)  | 88.7 (83.5 to 93.9)   | <b>&gt;= 18</b> | 11.4 (7.3 to 15.5)   | 88.5 (84.4 to 92.7)     |
| <b>&gt;= 21</b> | 12.6 (6.9 to 18.3)  | 89.6 (84.4 to 94.9)   | <b>&gt;= 19</b> | 13.4 (8.9 to 17.9)   | 90.3 (86.3 to 94.2)     |
| <b>&gt;= 22</b> | 15.4 (8.3 to 22.4)  | 91.6 (86.2 to 97.0)   | <b>&gt;= 20</b> | 14.1 (9.5 to 18.8)   | 90.8 (87.0 to 94.7)     |
| <b>&gt;= 23</b> | 15.5 (8.4 to 22.6)  | 91.7 (86.3 to 97.1)   | <b>&gt;= 21</b> | 15.2 (10.3 to 20.1)  | 91.5 (87.7 to 95.3)     |
| <b>&gt;= 24</b> | 17.3 (9.3 to 25.3)  | 92.6 (87.1 to 98.2)   | <b>&gt;= 22</b> | 15.7 (10.7 to 20.7)  | 91.8 (88.0 to 95.6)     |
| <b>&gt;= 25</b> | 17.7 (9.5 to 25.9)  | 92.8 (87.3 to 98.4)   | <b>&gt;= 23</b> | 15.4 (10.3 to 20.4)  | 91.6 (87.7 to 95.5)     |
| <b>&gt;= 26</b> | 17.3 (9.1 to 25.6)  | 92.6 (86.9 to 98.3)   | <b>&gt;= 24</b> | 15.9 (10.6 to 21.2)  | 91.9 (88.0 to 95.8)     |
| <b>&gt;= 27</b> | 17.5 (9.2 to 25.9)  | 92.7 (87.0 to 98.4)   | <b>&gt;= 25</b> | 16.1 (10.5 to 21.6)  | 92.0 (87.9 to 96.1)     |
| <b>&gt;= 28</b> | 19.2 (10.2 to 28.3) | 93.5 (87.8 to 99.1)   | <b>&gt;= 26</b> | 18.1 (12.3 to 23.9)  | 93.0 (89.1 to 96.8)     |
| <b>&gt;= 29</b> | 23.2 (12.2 to 34.2) | 94.8 (89.0 to 100)    | <b>&gt;= 27</b> | 19.0 (13.0 to 25.0)  | 93.4 (89.6 to 97.2)     |

|                 |                     |                    |                 |                     |                     |
|-----------------|---------------------|--------------------|-----------------|---------------------|---------------------|
| <b>&gt;= 31</b> | 26.0 (14.0 to 38.1) | 95.5 (89.8 to 100) | <b>&gt;= 28</b> | 22.3 (15.9 to 28.7) | 94.5 (91.0 to 98.0) |
| <b>&gt;= 32</b> | 27.1 (14.6 to 39.5) | 95.7 (90.0 to 100) | <b>&gt;= 29</b> | 23.7 (17.1 to 30.3) | 94.9 (91.5 to 98.3) |
| <b>&gt;= 33</b> | 29.6 (15.8 to 43.4) | 96.2 (90.4 to 100) | <b>&gt;= 31</b> | 27.7 (20.5 to 34.9) | 95.8 (92.6 to 99.1) |
| <b>&gt;= 34</b> | 31.1 (16.8 to 45.4) | 96.4 (90.7 to 100) | <b>&gt;= 33</b> | 28.4 (20.9 to 36.0) | 96.0 (92.7 to 99.3) |
| <b>&gt;= 35</b> | 31.9 (17.4 to 46.5) | 96.6 (90.9 to 100) | <b>&gt;= 34</b> | 33.2 (24.3 to 42.1) | 96.8 (93.4 to 100)  |
| <b>&gt;= 37</b> | 34.6 (19.2 to 50.1) | 97.0 (91.4 to 100) | <b>&gt;= 35</b> | 36.5 (23.7 to 49.2) | 97.2 (92.8 to 100)  |
| <b>&gt;= 38</b> | 31.7 (15.5 to 47.9) | 96.5 (90.2 to 100) | <b>&gt;= 36</b> | 35.4 (22.3 to 48.4) | 97.0 (92.4 to 100)  |
| <b>&gt;= 40</b> | 33.2 (15.7 to 50.7) | 96.8 (90.2 to 100) | <b>&gt;= 38</b> | 37.1 (23.3 to 50.9) | 97.3 (92.6 to 100)  |
| <b>&gt;= 41</b> | 32.3 (14.3 to 50.4) | 96.6 (89.7 to 100) | <b>&gt;= 39</b> | 39.0 (24.6 to 53.3) | 97.5 (92.8 to 100)  |
| <b>&gt;= 42</b> | 36.7 (17.1 to 56.4) | 97.2 (90.5 to 100) | <b>&gt;= 40</b> | 41.0 (26.2 to 55.9) | 97.7 (93.1 to 100)  |
| <b>&gt;= 44</b> | 34.3 (14.5 to 54.1) | 96.9 (89.7 to 100) | <b>&gt;= 41</b> | 38.5 (23.3 to 53.7) | 97.4 (92.4 to 100)  |
| <b>&gt;= 45</b> | 31.7 (11.9 to 51.6) | 96.5 (88.7 to 100) | <b>&gt;= 43</b> | 38.0 (21.8 to 54.2) | 97.4 (92.0 to 100)  |
| <b>&gt;= 46</b> | 34.1 (11.7 to 56.4) | 96.9 (88.7 to 100) | <b>&gt;= 44</b> | 47.9 (28.7 to 67.1) | 98.2 (93.1 to 100)  |
| <b>&gt;= 49</b> | 49.4 (19.2 to 79.5) | 98.3 (90.6 to 100) | <b>&gt;= 45</b> | 43.4 (18.6 to 68.2) | 97.9 (90.7 to 100)  |
| <b>&gt;= 51</b> | 57.5 (22.6 to 92.5) | 98.8 (91.0 to 100) | <b>&gt;= 53</b> | 43.4 (0.01 to 99.9) | 97.9 (77.5 to 100)  |
| <b>&gt;= 53</b> | 61.9 (22.3 to 99.9) | 99.0 (90.8 to 100) |                 |                     |                     |
| <b>&gt;= 56</b> | 54.9 (10.4 to 99.4) | 98.7 (88.3 to 100) |                 |                     |                     |
| <b>&gt;= 57</b> | 61.9 (5.8 to 99.9)  | 99.0 (87.4 to 100) |                 |                     |                     |

Pre-test probability is based on the results of application of the CPR

Post-test probability is calculated using the pre-test probability and a LR+ of 60.03 for atypical lymphocytosis

**Supplementary Table 5: Post-test probabilities incorporating atypical lymphocytosis for positive EBV (Model 2 and Model 4)**

| Model 2 |                                    |                                     | Model 4 |                                    |                                     |
|---------|------------------------------------|-------------------------------------|---------|------------------------------------|-------------------------------------|
| Score   | Pre-test probability<br>% (95% CI) | Post-test probability<br>% (95% CI) | Score   | Pre-test probability<br>% (95% CI) | Post-test probability %<br>(95% CI) |
| ≥0      | 8.0 (4.8 to 11.2)                  | 83.9 (79.6 to 88.2)                 | ≥0      | 8.0 (4.8 to 11.2)                  | 83.9 (80.0 to 87.9)                 |
| ≥2      | 22.1 (12.1 to 32.2)                | 94.5 (88.9 to 100)                  | ≥1      | 15.7 (9.2 to 22.2)                 | 91.8 (86.8 to 96.7)                 |
| ≥5      | 23.3 (11.6 to 35.0)                | 94.8 (88.6 to 100)                  | ≥2      | 19.0 (10.0 to 28.0)                | 93.4 (87.7 to 99.1)                 |
| ≥7      | 52.2 ( 24.5 to 79.9)               | 98.5 (91.7 to 100)                  | ≥3      | 23.2 (8.5 to 37.9)                 | 94.8 (87.0 to 100)                  |

Pre-test probability is based on the results of application of the CPR

Post-test probability is calculated using the pre-test probability and a LR+ of 60.03 for atypical lymphocytosis

**Supplementary Table 6: The number of patients with and without EBV at each level of each point score**

|                           | Model 1      |                 | Model 2      |                 | Model 3      |                 | Model 4<br>(derivation) |                 | Model 4<br>(validation) |                 |
|---------------------------|--------------|-----------------|--------------|-----------------|--------------|-----------------|-------------------------|-----------------|-------------------------|-----------------|
| Total<br>Score/<br>Points | EBV<br>n (%) | No EBV<br>n (%) | EBV<br>n (%) | No EBV<br>n (%) | EBV<br>n (%) | No EBV<br>n (%) | EBV<br>n (%)            | No EBV<br>n (%) | EBV<br>n (%)            | No EBV<br>n (%) |
| 0                         | 0            | 1 (100)         | 13 (5.8)     | 211<br>(94.2)   |              | 1 (100)         | 13<br>(6.28)            | 194<br>(93.72)  | 147<br>(9.44)           | 1410<br>(90.56) |
| 1                         | 0            | 0               | 0            | 0               | 0            | 0               | 7<br>(15.91)            | 37<br>(84.09)   | 42<br>(15.22)           | 234<br>(84.78)  |
| 2                         | 0            | 0               | 4 (25)       | 12 (75)         | 0            | 0               | 10<br>(23.81)           | 32<br>(76.19)   | 106<br>(30.46)          | 242<br>(69.54)  |
| 3                         | 0            | 0               | 0            | 0               | 0            | 1 (100)         | 11<br>(33.33)           | 22<br>(66.67)   | 84<br>(52.17)           | 77<br>(47.83)   |
| 4                         | 0            | 10 (100)        | 0            | 0               | 0            | 0               | 0                       | 0               | 0                       | 0               |
| 5                         | 0            | 0               | 8<br>(20.51) | 31<br>(79.49)   | 0            | 14 (100)        | 0                       | 0               | 0                       | 0               |
| 6                         | 0            | 8 (100)         | 0            | 0               | 0            | 10 (100)        | 0                       | 0               | 0                       | 0               |
| 7                         | 0            | 10 (100)        | 8<br>(61.54) | 5 (38.46)       | 0            | 8               | 0                       | 0               | 0                       | 0               |
| 8                         | 0            | 0               | 0            | 0               | 0            | 4 (100)         | 0                       | 0               | 0                       | 0               |
| 9                         | 0            | 4 (100)         | 0            | 0               | 0            | 0               | 0                       | 0               | 0                       | 0               |
| 11                        | 0            | 2 (100)         | 0            | 0               | 0            | 0               | 0                       | 0               | 0                       | 0               |
| 12                        | 0            | 1 (100)         | 0            | 0               | 0            | 2 (100)         | 0                       | 0               | 0                       | 0               |
| 13                        | 0            | 0               | 0            | 0               | 0            | 2 (100)         | 0                       | 0               | 0                       | 0               |
| 14                        | 0            | 1 (100)         | 0            | 0               | 0            | 3 (100)         | 0                       | 0               | 0                       | 0               |
| 15                        | 0            | 2 (100)         | 0            | 0               | 1 (25)       | 3 (75)          | 0                       | 0               | 0                       | 0               |
| 16                        | 0            | 1 (100)         | 0            | 0               | 0            | 3 (100)         | 0                       | 0               | 0                       | 0               |
| 17                        | 0            | 1 (100)         | 0            | 0               | 3 (6)        | 47 (94)         | 0                       | 0               | 0                       | 0               |
| 18                        | 2 (4.26)     | 45<br>(95.74)   | 0            | 0               | 1 (3.57)     | 27<br>(96.43)   | 0                       | 0               | 0                       | 0               |
| 19                        | 0            | 0               | 0            | 0               | 1 (8.33)     | 11<br>(91.67)   | 0                       | 0               | 0                       | 0               |
| 20                        | 0            | 11 (100)        | 0            | 0               | 1 (7.69)     | 12<br>(92.31)   | 0                       | 0               | 0                       | 0               |
| 21                        | 1 (3.33)     | 29<br>(96.67)   | 0            | 0               | 0            | 3 (100)         | 0                       | 0               | 0                       | 0               |

|    |              |               |   |   |              |               |   |   |   |   |
|----|--------------|---------------|---|---|--------------|---------------|---|---|---|---|
| 22 | 0            | 1 (100)       | 0 | 0 | 1<br>(33.33) | 2<br>(66.67)  | 0 | 0 | 0 | 0 |
| 23 | 1 (6.67)     | 14<br>(93.33) | 0 | 0 | 0            | 3 (100)       | 0 | 0 | 0 | 0 |
| 24 | 0            | 1 (100)       | 0 | 0 | 0            | 1 (100)       | 0 | 0 | 0 | 0 |
| 25 | 1 (25)       | 3 (75)        | 0 | 0 | 1 (7.14)     | 13<br>(92.86) | 0 | 0 | 0 | 0 |
| 26 | 1 (25)       | 3 (75)        | 0 | 0 | 2<br>(16.67) | 10<br>(83.33) | 0 | 0 | 0 | 0 |
| 27 | 1 (100)      | 0             | 0 | 0 | 0            | 9 (100)       | 0 | 0 | 0 | 0 |
| 28 | 0            | 4 (100)       | 0 | 0 | 0            | 3 (100)       | 0 | 0 | 0 | 0 |
| 29 | 1 (6.67)     | 14<br>(93.33) | 0 | 0 | 1 (10)       | 9 (90)        | 0 | 0 | 0 | 0 |
| 31 | 1<br>(33.33) | 2<br>(66.67)  | 0 | 0 | 0            | 1 (100)       | 0 | 0 | 0 | 0 |
| 32 | 1<br>(14.29) | 6<br>(85.71)  | 0 | 0 | 0            | 0             | 0 | 0 | 0 | 0 |
| 33 | 0            | 1 (100)       | 0 | 0 | 1 (12.5)     | 7 (87.5)      | 0 | 0 | 0 | 0 |
| 34 | 0            | 2 (100)       | 0 | 0 | 1 (20)       | 4 (80)        | 0 | 0 | 0 | 0 |
| 35 | 0            | 3 (100)       | 0 | 0 | 2 (50)       | 2 (50)        | 0 | 0 | 0 | 0 |
| 36 | 0            | 0             | 0 | 0 | 0            | 1 (100)       | 0 | 0 | 0 | 0 |
| 37 | 3 (50)       | 3 (50)        | 0 | 0 | 0            | 0             | 0 | 0 | 0 | 0 |
| 38 | 1 (25)       | 3 (75)        | 0 | 0 | 0            | 1 (100)       | 0 | 0 | 0 | 0 |
| 39 | 0            | 0             | 0 | 0 | 0            | 1 (100)       | 0 | 0 | 0 | 0 |
| 40 | 0            | 8 (100)       | 0 | 0 | 1 (100)      | 0             | 0 | 0 | 0 | 0 |
| 41 | 0            | 1 (100)       | 0 | 0 | 1 (50)       | 1 (50)        | 0 | 0 | 0 | 0 |
| 42 | 1 (12.5)     | 7 (87.5)      | 0 | 0 | 0            | 0             | 0 | 0 | 0 | 0 |
| 43 | 0            | 0             | 0 | 0 | 2<br>(28.57) | 5<br>(71.43)  | 0 | 0 | 0 | 0 |
| 44 | 0            | 2 (100)       | 0 | 0 | 2<br>(66.67) | 1<br>(33.33)  | 0 | 0 | 0 | 0 |
| 45 | 0            | 1 (100)       | 0 | 0 | 3 (50)       | 3 (50)        | 0 | 0 | 0 | 0 |
| 46 | 1<br>(33.33) | 2<br>(66.67)  | 0 | 0 | 0            | 0             | 0 | 0 | 0 | 0 |
| 49 | 1 (50)       | 1 (50)        | 0 | 0 | 0            | 0             | 0 | 0 | 0 | 0 |
| 51 | 1 (50)       | 1 (50)        | 0 | 0 | 0            | 0             | 0 | 0 | 0 | 0 |
| 53 | 1 (100)      | 0             | 0 | 0 | 0            | 1 (100)       | 0 | 0 | 0 | 0 |
| 56 | 1 (50)       | 1 (50)        | 0 | 0 | 0            | 0             | 0 | 0 | 0 | 0 |
| 57 | 1<br>(16.67) | 5<br>(83.33)  | 0 | 0 | 0            | 0             | 0 | 0 | 0 | 0 |
| 64 | 1 (100)      | 0             | 0 | 0 | 0            | 0             | 0 | 0 | 0 | 0 |



|    |         |   |   |   |          |   |   |   |   |   |
|----|---------|---|---|---|----------|---|---|---|---|---|
| 71 | 0       | 0 | 0 | 0 | 1 (2.38) | 0 | 0 | 0 | 0 | 0 |
| 74 | 1 (100) | 0 | 0 | 0 | 0        | 0 | 0 | 0 | 0 | 0 |
